# Supplementary material
Source: Springer Nature journal article supplement (https://www.springermedizin.de/resource/supplementary/12936_2012_2550_MOESM6_ESM.pdf/9543122)

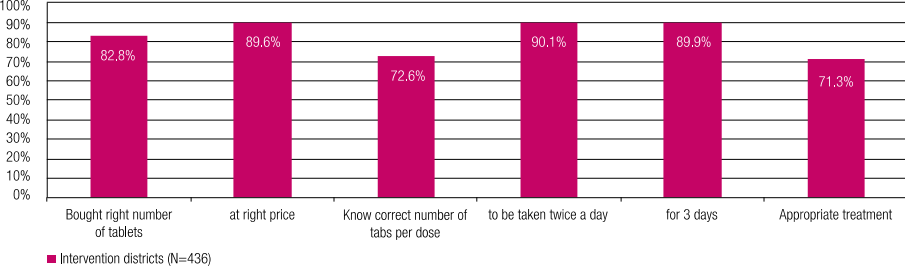

Supplement: MOESM6 [file 9543122]
